# Supplementary material for: Antitumor Activity of the MEK Inhibitor TAK-733 against Melanoma Cell Lines and Patient-Derived Tumor Explants
Source: Oxford University Press journal article supplement (doi:10.1158/1535-7163.mct-13-1012), 2014-11-07
Supplement: 15357163mct131012-sup-122807_2_supp_2676951_nchd45.doc [file 15357163mct131012-sup-122807_2_supp_2676951_nchd45.doc]

**Supplementary Figure Legends**

**Suppl Figure 1.** Chemical structure and molecular data for TAK-733 (Takeda, Inc.)

**Suppl Figure 2.** Immunoblot analysis of downstream effectors upon administration of TAK-733. MeWo and HS294T cell lines were serum starved overnight and then administered TAK-733 for 1 hr. Cells were then challenged with 10% FBS for 30 mins, harvested and immunoblotted with the indicated antibodies.

**Suppl Figure 3.** Immunoblot analysis of downstream effectors and markers of apoptosis upon administration of TAK-733. A375, RPMI 7951 and HS294T cell lines were treated with TAK-733 (0.125 M) for 24 hr. Cells were then harvested and immunoblotted with the indicated antibodies.

**Suppl Figure 4.** Representative PDTX model MB1255 treated with vehicle or TAK-733 (25 mg/kg PO, QD) shown after Day 20 of dosing.

**Suppl Figure 5.** Immunoblot analysis of melanoma PDTX models administered with vehicle or TAK-733 (10 mg/kg) at end of study (day 30).

**Suppl Figure 6.** Genomic analysis of MB1374 PDTX tumors during regrowth, re-administer and administer to resistance as described in Material and Methods. (A) Heat map depicting clustering of genes whose expression is up-regulated or down-regulated in response to the indicated treatment regimens. (B) Schematic representation of KEGG pathway analysis comparing tumors administered with vehicle to those administered to resistance. Red boxes indicate core genes that are upregulated in the administer to resistance tumors, as compare to vehicle controls.
